# Supplementary material for: An efficient pure polyimide ammonia sensor
Source: Royal Society of Chemistry journal article supplement (doi:10.1039/c6tc02375d), 2016-01-01
Supplement: c6tc02375d1.pdf [file c6tc02375d1.pdf]

## An Efficient Polyimide Ammonia Sensor

Evie L. Papadopoulou<sup>a</sup>, Davide Morselli<sup>a</sup>, Mirko Prato<sup>b</sup>, Alessandro Barcellona<sup>c</sup>, Athanassia Athanassiou<sup>a</sup>

and Ilker S. Bayer<sup>a</sup>

<sup>a</sup> Istituto Italiano di Tecnologia, Smart Materials Group, via Morego 30, 16163 Genoa (Italy).

<sup>b</sup> Istituto Italiano di Tecnologia, Nanochemistry Group, via Morego 30, 16163 Genoa (Italy).

<sup>c</sup> Istituto Italiano di Tecnologia, Nanophysics Department, Via Morego 30, 16163 Genoa (Italy).

### Supporting Information

#### S1: PMDA-ODA curing

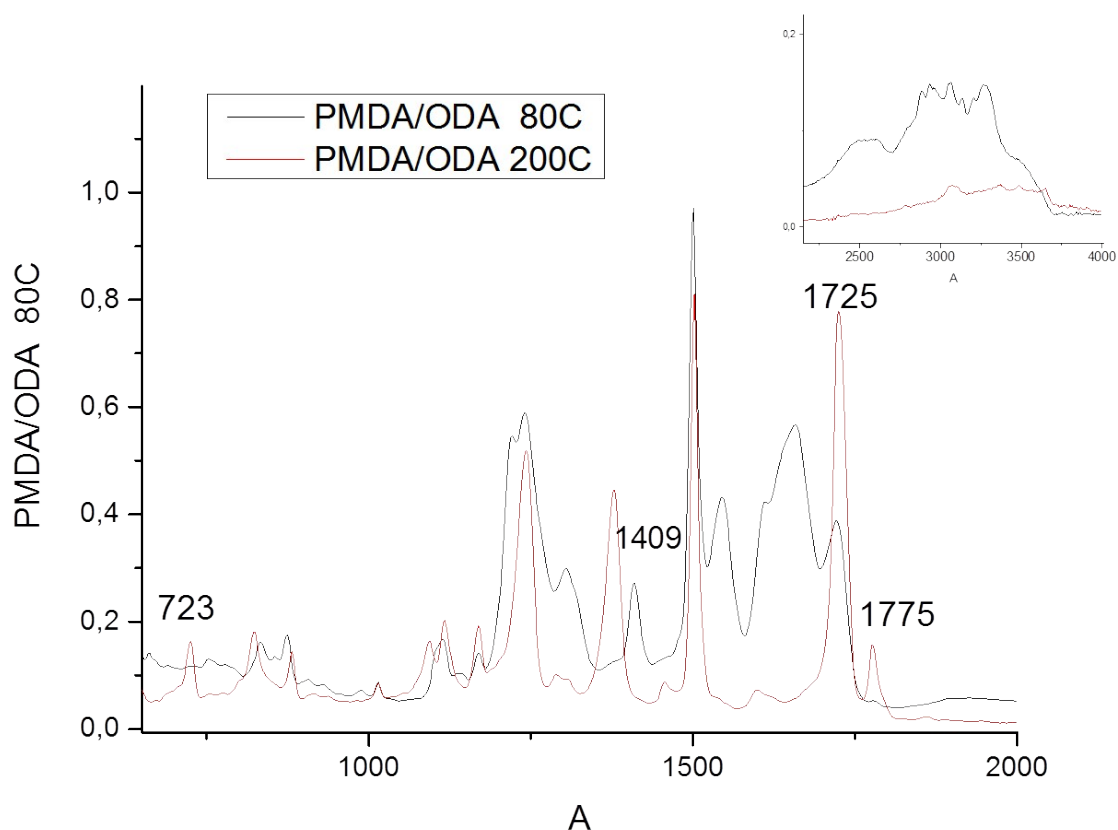

**S1:** FTIR spectra of the uncured (blue) and cured (red) PMDA-ODA films.

The PMDA-ODA curing involves the condensation of the amide group and hydroxyl group (carried out at 200°C) following the mechanism proposed by Jwo-Huei Jou et al.<sup>1</sup>. As expected, the cured sample shows the typical peak due to (CO)<sub>2</sub>NC imide symmetrical stretching centred at 1775 cm<sup>-1</sup>, meaningful of an efficient curing procedure. This was further confirmed by the band at 3000 cm<sup>-1</sup>, due to H-bond typical of NH<sub>2</sub> and OH, that disappears after curing. In addition, the absorption peaks at 1550 cm<sup>-1</sup> (amide I, CNH vibration) and 1409 cm<sup>-1</sup> disappear, whereas two new peaks appear at 1380 cm<sup>-1</sup> (imide II, C-N stretching vibration) and 725 cm<sup>-1</sup> (imide IV, vibration of cyclic C=O)<sup>2</sup>.

## S2: Water response vs analyte

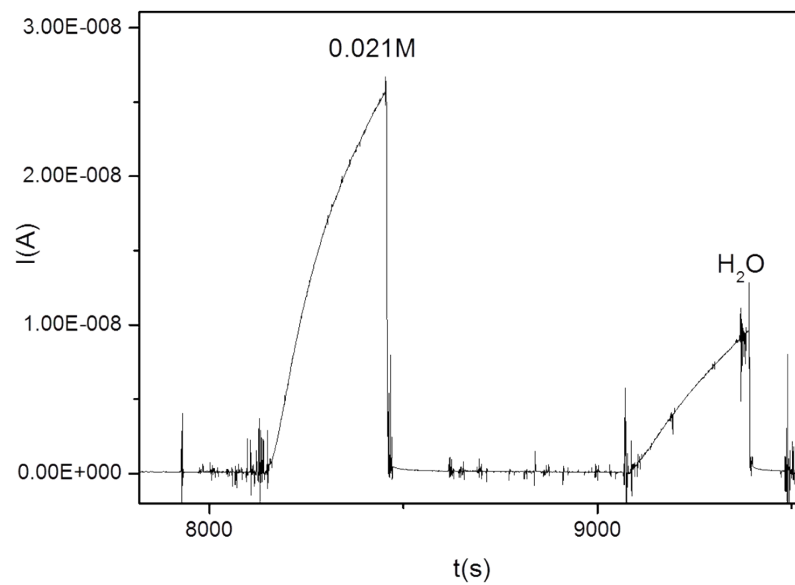

The sensor response for 0.021 M ammonia solution and water. The increase of the electrical current in the presence of water, is much smaller than in the presence of ammonia.

## S3: Device

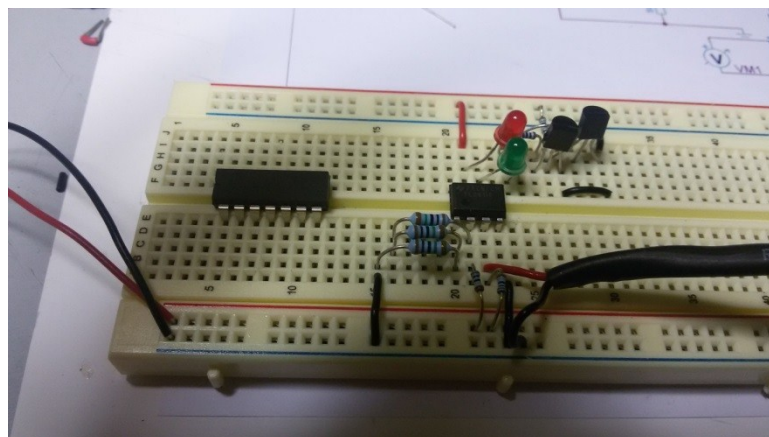

### S3a: The electrical circuit.



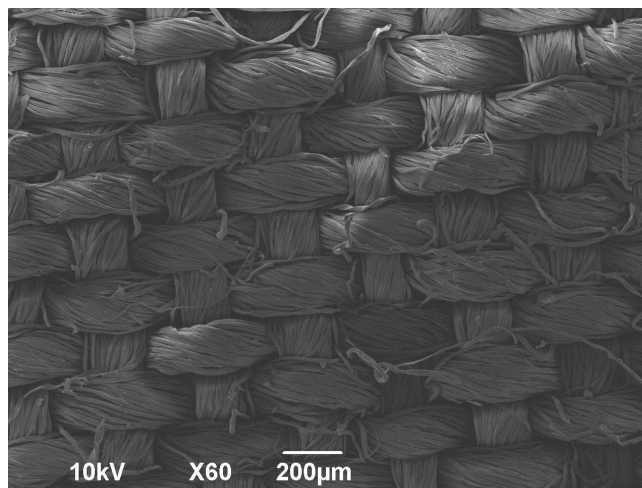

**S4b:** SEM image of the cotton covered with PMDA-ODA, after curing.

### S5: LOD calculation

The LOD was calculated using Henry's law constant as described in Ref. 3.

It is theoretically known that:

$$k_H^{cc} = \frac{c_a}{c_g} \quad (1)$$

where the Henry's solubility,  $k_H^{cc}$ , describing the solubility of a gas in an aqueous solution, is expressed as the dimensionless ratio between the aqueous-phase concentration,  $c_a$ , of a species and its gas-phase concentration  $c_g$ .

Furthermore,

$$k_H^{cc} = k_H \times RT \quad (2)$$

Where,  $k_H$ , is Henry's constant and equals 60 mol/m<sup>3</sup>Pa, R is the ideal gas constant (0.082 L atm/K mol) and T is the absolute temperature.

From (1) and (2) one can calculate  $c_g$ , when  $c_a$  is known (in the present case  $c_a=59.5$  ppm).

1. Jou, J. H.; Huang, P. T., Effect of thermal curing on the structures and properties of aromatic polyimide films. *Macromolecules* **1991**, 24 (13), 3796-3803.
2. Nishino, T.; Kotera, M.; Inayoshi, N.; Miki, N.; Nakamae, K., Residual stress and microstructures of aromatic polyimide with different imidization processes. *Polymer* **2000**, 41 (18), 6913-6918.
3. R. Sander, Compilation of Henry's law constants (version 4.0) for water as solvent. *Atmos. Chem. Phys.*, 15, 4399-4981, 2015.
